# Supplementary material
Source: ML conference proceedings conference paper supplement (https://proceedings.mlr.press/v151/he22a.html)

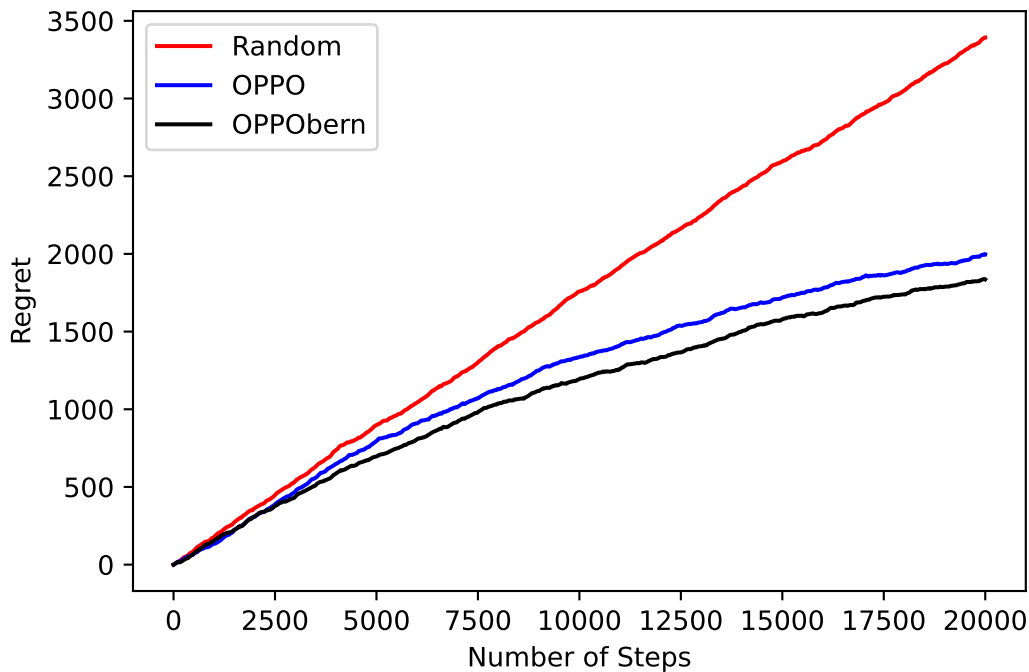

Supplement: Supplementary file 1 [file he22a-supp.zip]
